# Supplementary material for: Detour Behavior of Mice Trained with Transparent, Semitransparent and Opaque Barriers
Source: PubMed Central journal article supplement (PMC5010287; doi:10.1371/journal.pone.0162018), 2016-09-02
Supplement: pone.0162018.s001.pdf [file pone.0162018.s001.pdf]

S1 Fig. Animals belonged to one litter and were trained in the order from mouse 1 to 5.

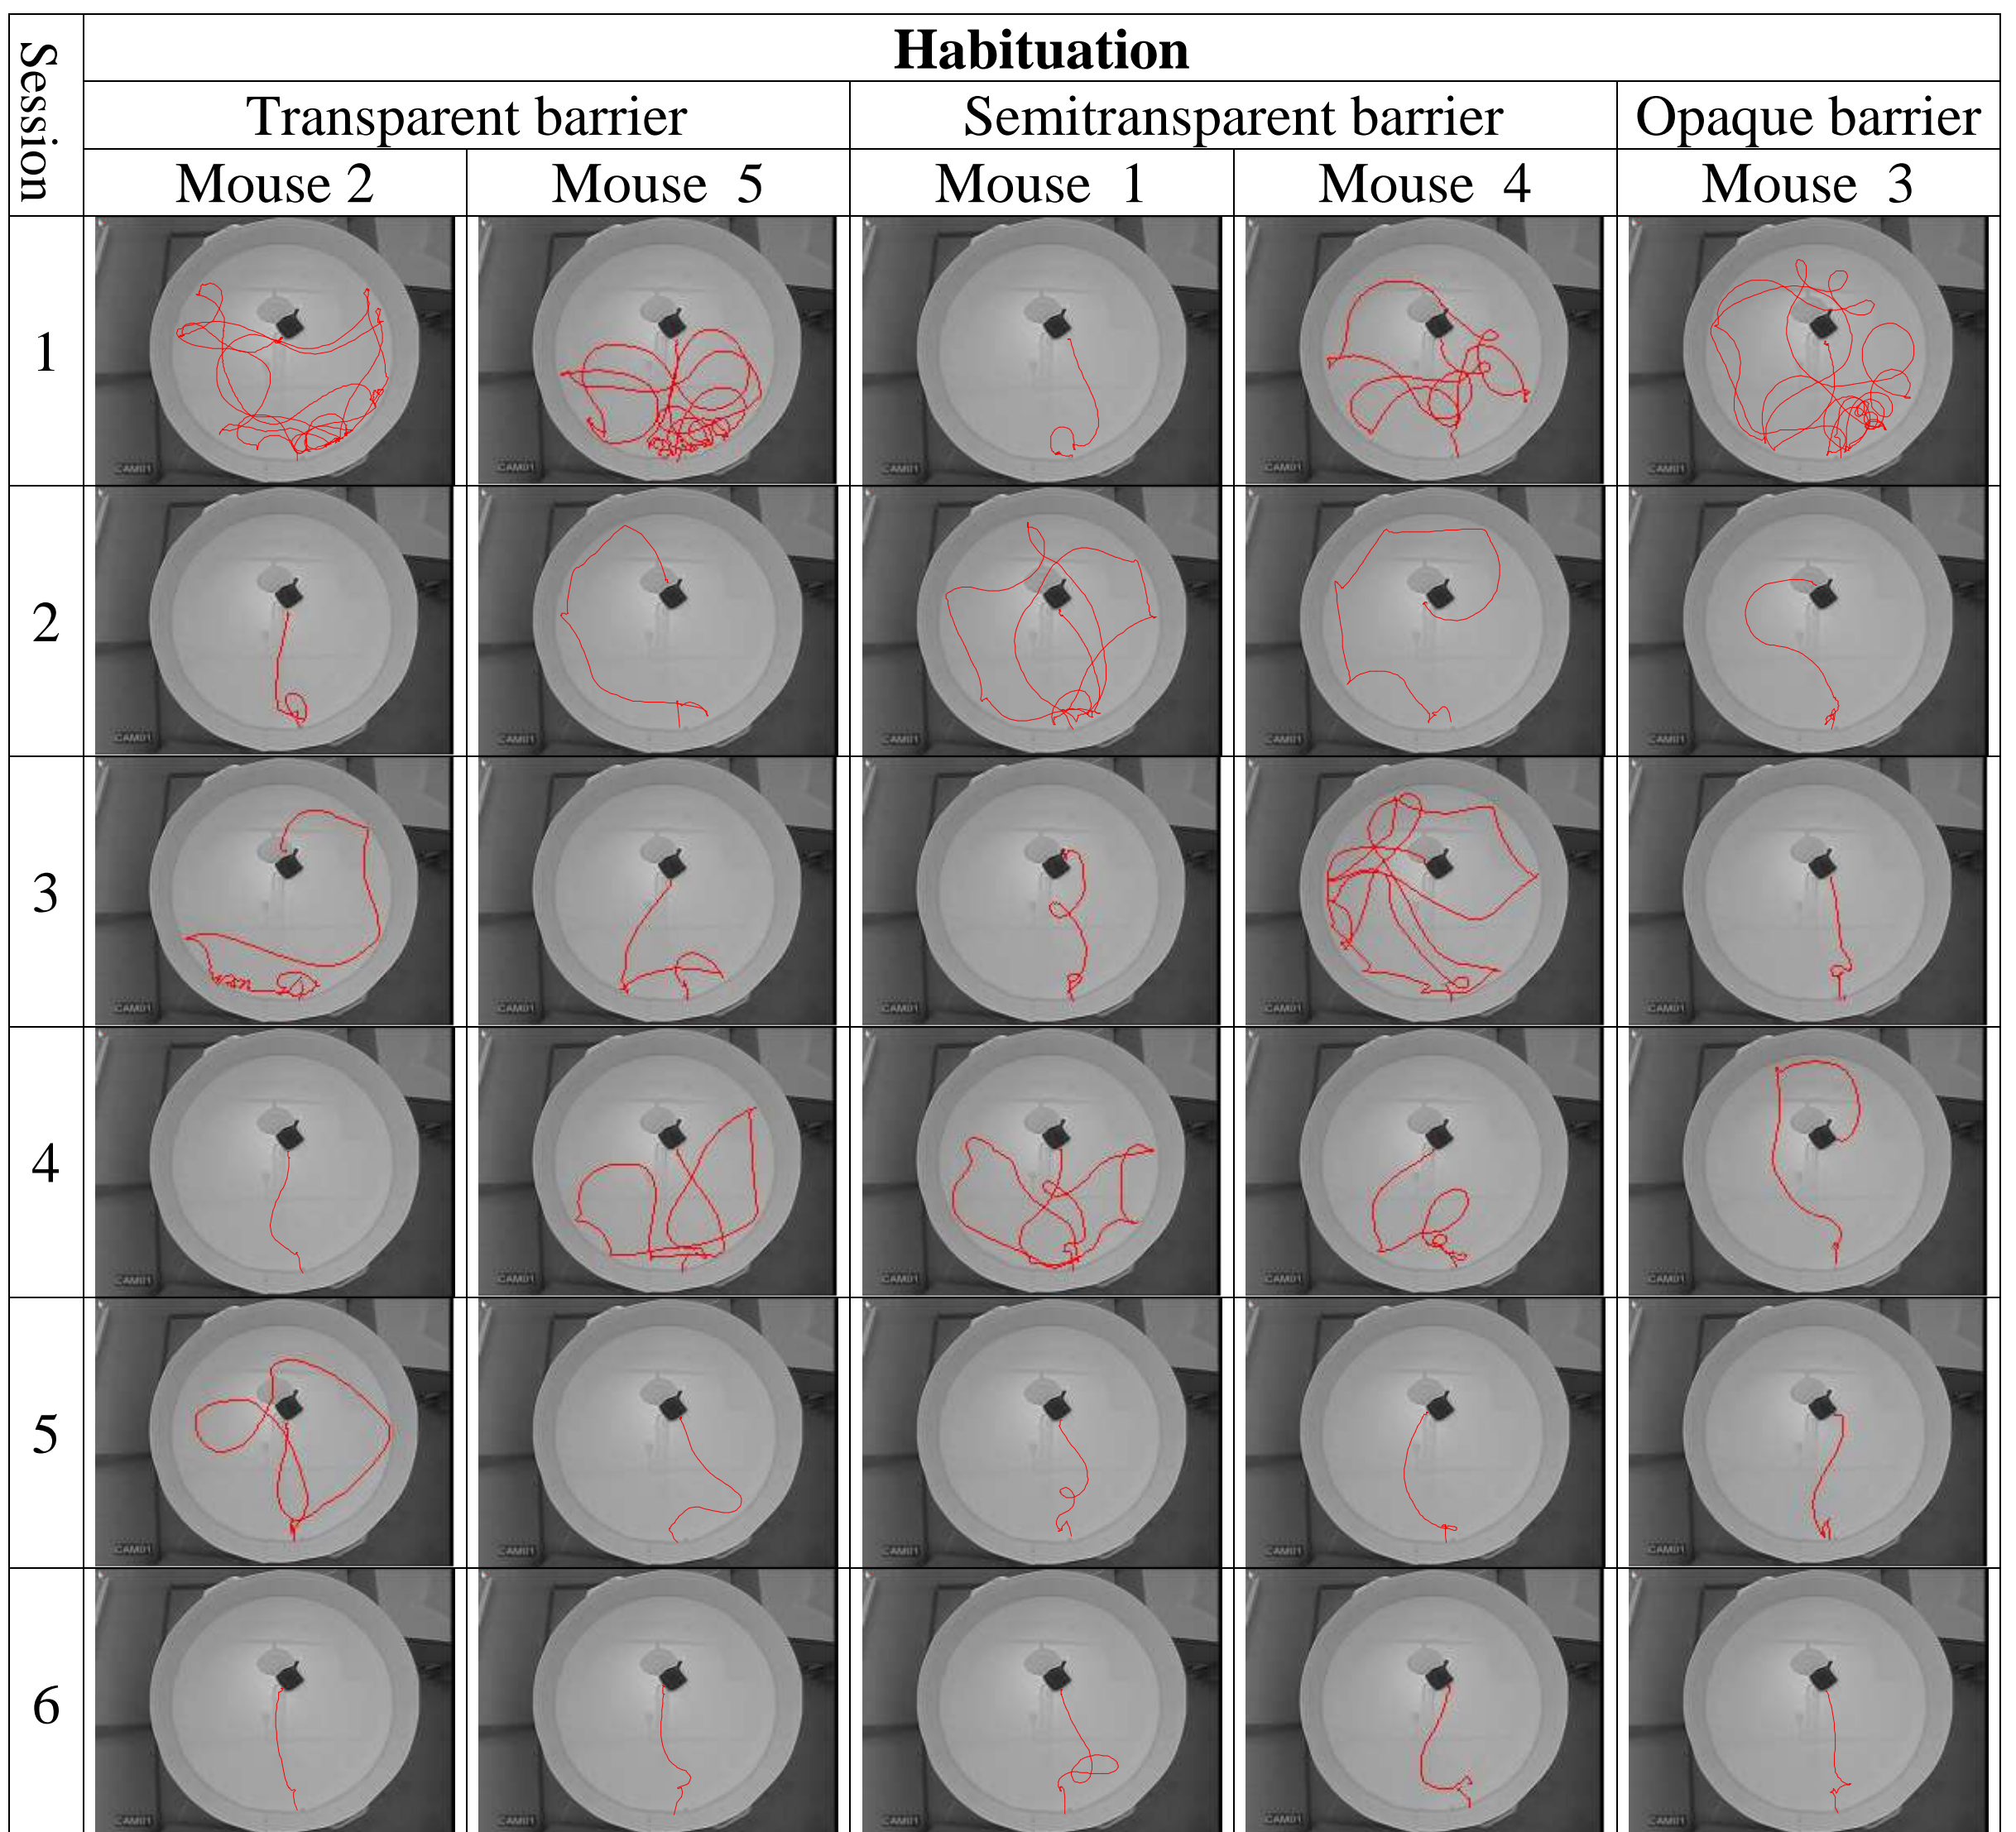

| Trial | Inward detour (Day 1)                                                               |                                                                                     |                                                                                       |                                                                                       |                                                                                       |
|-------|-------------------------------------------------------------------------------------|-------------------------------------------------------------------------------------|---------------------------------------------------------------------------------------|---------------------------------------------------------------------------------------|---------------------------------------------------------------------------------------|
|       | Transparent barrier                                                                 |                                                                                     | Semitransparent barrier                                                               |                                                                                       | Opaque barrier                                                                        |
|       | Mouse 2                                                                             | Mouse 5                                                                             | Mouse 1                                                                               | Mouse 4                                                                               | Mouse 3                                                                               |
| 1     | 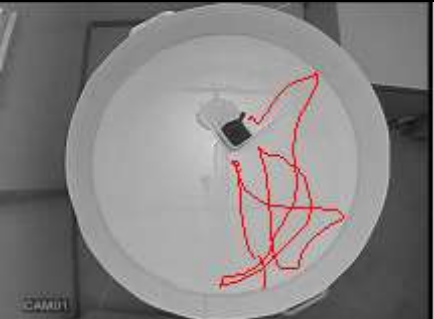   |    |    |    |    |
| 2     |   |   |   |   |   |
| 3     |  |  |  |  |  |
| 4     |  |  |  |  |  |
| 5     |  |  |  |  |  |
| 6     |  |  |  |  |  |
| 7     |  |  |  |  |  |



| Trial | <b>Inward detour (Day 2)</b>                                                        |                                                                                     |                                                                                      |                                                                                       |                                                                                       |
|-------|-------------------------------------------------------------------------------------|-------------------------------------------------------------------------------------|--------------------------------------------------------------------------------------|---------------------------------------------------------------------------------------|---------------------------------------------------------------------------------------|
|       | Transparent barrier                                                                 |                                                                                     | Semitransparent barrier                                                              |                                                                                       | Opaque barrier                                                                        |
|       | Mouse 2                                                                             | Mouse 5                                                                             | Mouse 1                                                                              | Mouse 4                                                                               | Mouse 3                                                                               |
| 1     | 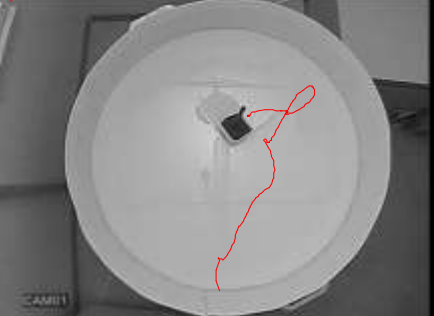   |    |    |    |    |
| 2     |    |    |    |    |    |
| 3     |   |   |   |   |   |
| 4     |  |  |  |  |  |
| 5     |  |  |  |  |  |

| Trial | <b>Outward detour (Day 3)</b>                                                       |                                                                                     |                                                                                      |                                                                                       |                                                                                       |
|-------|-------------------------------------------------------------------------------------|-------------------------------------------------------------------------------------|--------------------------------------------------------------------------------------|---------------------------------------------------------------------------------------|---------------------------------------------------------------------------------------|
|       | Transparent barrier                                                                 |                                                                                     | Semitransparent barrier                                                              |                                                                                       | Opaque barrier                                                                        |
|       | Mouse 2                                                                             | Mouse 5                                                                             | Mouse 1                                                                              | Mouse 4                                                                               | Mouse 3                                                                               |
| 1     | 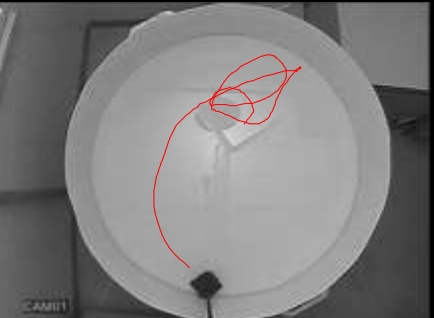 |  |  |  |  |
| 2     |  |  |  |  |  |
| 3     |  |  |  |  |  |
